# Supplementary material for: Why is this Happening? A Brief Measure of Parental Attributions Assessing Parents’ Intentionality, Permanence, and Dispositional Attributions of Their Child with Conduct Problems
Source: Springer Nature journal article supplement (doi:10.1007/s10578-018-0844-2), 2018-10-08
Supplement: MOESM1 [file 16184430]

**Supplementary Material A**

**PARENT ATTRIBUTION MEASURE (PAM)**

All parents report having negative thoughts about their children, especially when they have behavior problems. This questionnaire is tapping into your darkest thoughts about your child, so please be as honest as you can when answering the questions. Please rate whether each statement is: not all true, somewhat true, or certainly true.

|  | Not at all true | Somewhat true | Certainly true |
| --- | --- | --- | --- |
| 1. My child doesn’t mean to do the wrong thing. | 0 | 1 | 2 |
| 2. My child doesn’t bring out good feelings in other people. | 0 | 1 | 2 |
| 3. This misbehavior is just a phase that my child is going through. | 0 | 1 | 2 |
| 4. My child ‘pushes my buttons’ on purpose. | 0 | 1 | 2 |
| 5. My child will always be a problem. | 0 | 1 | 2 |
| 6. It is difficult to like who my child is. | 0 | 1 | 2 |
| 7. My child deliberately does awful things. | 0 | 1 | 2 |
| 8. My child’s problems are likely to continue throughout their life. | 0 | 1 | 2 |
| 9. I worry that my child is a bad person. | 0 | 1 | 2 |
| 10. My child will eventually overcome his/her problems. | 0 | 1 | 2 |
| 11. My child has a good heart. | 0 | 1 | 2 |
| 12. My child takes pleasure in my distress. | 0 | 1 | 2 |

**Scoring PAM Factors**

**Reverse Scoring:**  The following items are to be reversed scored such that higher scores represent negative parental attributions: Item 1, Item 3, Item 10, Item 11

**Scoring Total Scale**: Sum (Item 1_r, Item 2, Item 3_r, Item 4, Item 5, Item 6, Item 7, Item 8, Item 9, Item 10_r, Item 11_r, Item 12).

**Scoring Intentionality Factor**: Sum (Item 1_r, Item 4, Item 7, Item 12).

**Scoring Permanence Factor**: Sum (Item 3_r, Item 5, Item 8, Item 10_r)

**Scoring Disposition Factor**: Sum (Item 6, Item 2, Item 9, Item 11_r).

Supplementary Table 1.

*Inter-item polychoric correlations among the original 16 PAM items in the development sample.*

| PAM Items | 1 | 2 | 3 | 4 | 5 | 6 | 7 | 8 | 9 | 10 | 11 | 12 | 13 | 14 | 15 | 16 |
| --- | --- | --- | --- | --- | --- | --- | --- | --- | --- | --- | --- | --- | --- | --- | --- | --- |
| Item 1 |  |  |  |  |  |  |  |  |  |  |  |  |  |  |  |  |
| Item 2 | .36 |  |  |  |  |  |  |  |  |  |  |  |  |  |  |  |
| Item 3 | .38 | .59 |  |  |  |  |  |  |  |  |  |  |  |  |  |  |
| Item 4 | .33 | .51 | .38 |  |  |  |  |  |  |  |  |  |  |  |  |  |
| Item 5 | .30 | .58 | .48 | .37 |  |  |  |  |  |  |  |  |  |  |  |  |
| Item 6 | .31 | .43 | .49 | .57 | .39 |  |  |  |  |  |  |  |  |  |  |  |
| Item 7 | .10 | .26 | .14 | .08 | .36 | -.06 |  |  |  |  |  |  |  |  |  |  |
| Item 8 | .17 | -.08 | .07 | -.04 | -.01 | .07 | .08 |  |  |  |  |  |  |  |  |  |
| Item 9 | .36 | .50 | .33 | .15 | .64 | .45 | .64 | .30 |  |  |  |  |  |  |  |  |
| Item 10 | .34 | .75 | .67 | .63 | .61 | .49 | .35 | .01 | .38 |  |  |  |  |  |  |  |
| Item 11 | .56 | .54 | .48 | .58 | .51 | .55 | .28 | .03 | .45 | .65 |  |  |  |  |  |  |
| Item 12 | .37 | .57 | .64 | .57 | .49 | .71 | .17 | -.02 | .30 | .59 | .60 |  |  |  |  |  |
| Item 13 | .41 | .58 | .49 | .44 | .56 | .50 | .25 | .04 | .55 | .68 | .61 | .54 |  |  |  |  |
| Item 14 | .12 | .27 | .43 | .28 | .42 | .50 | .43 | .17 | .40 | .38 | .31 | .58 | .50 |  |  |  |
| Item 15 | .51 | .49 | .44 | .43 | .75 | .33 | .59 | .19 | .79 | .62 | .68 | .50 | .62 | .48 |  |  |
| Item 16 | .50 | .51 | .41 | .67 | .47 | .45 | .30 | .03 | .29 | .60 | .65 | .51 | .48 | .37 | .62 |  |

*Note***.** PAM = Parent Attribution Measure.

Supplementary Table 2.

*Correlations between PAM factors and comparison scales for establishing construct validity in the clinical sample.*

|  | Mothers | | | | Fathers | | | | |
| --- | --- | --- | --- | --- | --- | --- | --- | --- | --- |
| Comparison Scale | Total Scale | Int Scale | Perm Scale | Disp Scale | | Total Scale | Int Scale | Perm Scale | Disp Scale |
| Conduct problems | .47* | .43* | .27* | .40* | .57* | | .49* | .36* | .49* |
| Parental self-efficacy | -.53* | -.43* | -.33* | -.52* | -.62* | | -.49* | -.50* | -.52* |
| Parental depression | .27* | .20* | .18* | .25* | .36* | | .21* | .28* | .35* |
| Positive parenting | -.23* | -.13* | -.22* | -.19* | -.24* | | -.08 | -.18* | -.32* |
| Corporal punishment | .25* | .21* | .19* | .20* | .19* | | .20* | .11 | .13 |
| Neg. parental feelings | .36* | .33* | .19* | .33* | .56* | | .37* | .42* | .52* |
| Child age | .22* | .11* | .26* | .15* | .26* | | .12 | .30* | .20* |
| CU Traits | .46* | .38* | .24* | .47* | .43* | | .33* | .30* | .39* |

*Note:* Int = Intentionality; Perm = Permanence; Disp = Disposition **p* < .05.

Supplementary Table 3.

*Results from linear regression modelling testing the predictive validity of the Disposition Scale.*

|  | Mothers | | | | Fathers | | | |
| --- | --- | --- | --- | --- | --- | --- | --- | --- |
| Model Variables | B | *SE*B | β | p-value | B | *SE*B | β | p-value |
| *Positive parenting* |  |  |  |  |  |  |  |  |
| Intercept | 13.74 | .28 |  | .00* | 13.38 | .34 |  | .00* |
| CU traits | -.03 | .04 | -.06 | .39 | -.02 | .04 | -.04 | .62 |
| Disposition scale | -.16 | .07 | -.17 | .01* | -.38 | .09 | -.31 | .00* |
| *Corporal punishment* |  |  |  |  |  |  |  |  |
| Intercept | 4.32 | .26 |  | .00* | 4.52 | .32 |  | .00* |
| CU traits | -.02 | .03 | -.03 | .62 | -.02 | .04 | -.03 | .69 |
| Disposition scale | .20 | .06 | .22 | .00* | .16 | .08 | .14 | .06† |
| *Parental feelings* |  |  |  |  |  |  |  |  |
| Intercept | 20.30 | .79 |  | .00* | 15.39 | .80 |  | .00* |
| CU traits | .09 | .10 | .05 | .41 | .25 | .10 | .15 | .02 |
| Disposition scale | .90 | .18 | .31 | .00* | 1.49 | .21 | .46 | .00* |

*Note:* CU = callous-unemotional **p* < .05; †*p* = .06.
